1 **Title**

2 Retrospective meta-transcriptomic identification of severe dengue in a traveller returning from  
3 Africa to Sweden, 1990

4  
5 **Authors**

6 Kristian Alfsnes<sup>1</sup>, Nina Lagerqvist<sup>2</sup>, Sirkka Vene<sup>2</sup>, Jon Bohlin<sup>1</sup>, Jenny Verner-Carlsson<sup>2</sup>, David  
7 Ekqvist<sup>3</sup>, Andreas Bråve<sup>2</sup>, Edward C. Holmes<sup>4</sup>, Weifeng Shi<sup>5</sup>, John H.-O. Pettersson<sup>4,6</sup>

8  
9 **Corresponding author**

10 John H.-O. Pettersson; john.pettersson@folkhalsomyndigheten.se; john.pettersson@gmail.com

11  
12 **Author affiliations**

13 <sup>1</sup>Infectious Disease Control and Environmental Health, Norwegian Institute of Public Health, Oslo,  
14 Norway.

15 <sup>2</sup>Public Health Agency of Sweden, Nobels väg 18, SE-171 82 Solna, Sweden.

16 <sup>3</sup>Division of Infectious Diseases, Department of Clinical and Experimental Medicine, Linköping  
17 University, Sweden.

18 <sup>4</sup>Marie Bashir Institute for Infectious Diseases and Biosecurity, Charles Perkins Centre, School of  
19 Life and Environmental Sciences and School of Medical Sciences, the University of Sydney,  
20 Sydney, New South Wales 2006, Australia.

21 <sup>5</sup>Taishan Medical University, Tai'an, Shandong, China.

22 <sup>6</sup>Zoonosis Science Center, Department of Medical Biochemistry and Microbiology, Uppsala  
23 University, Sweden.

24  
25 **Abstract**

26 The first imported case of severe haemorrhagic fever in Sweden was reported in 1990. Despite  
27 extensive diagnostic study, no aetiological agent was identified. Following retrospective  
28 investigation with total RNA-sequencing of plasma and urine samples collected during between 7–  
29 36 days from onset of symptoms, we identified dengue virus 3 (DENV-3) and a human pegivirus  
30 (HPgV). We conclude that the patient most likely suffered from haemorrhagic symptoms due to a  
31 severe dengue infection.

32  
33 **Key words**

34 Dengue virus, Dengue haemorrhagic fever, viral haemorrhagic fever, meta-transcriptomics, RNA-  
35 sequencing, Human pegivirus

36

37 **Background**

38 Currently, more than 20 enveloped RNA viruses are known to cause haemorrhagic fever, largely  
39 from four groups (arenaviruses, filoviruses, bunyaviruses, and flaviviruses) [1]. These pathogens  
40 can induce symptoms ranging from asymptomatic to severe life-threatening conditions, with some  
41 haemorrhagic fevers associated with mortality rates as high as 80% [1]. However, a major  
42 complicating factor is that the initial clinical presentations commonly overlap with syndromes that  
43 have a less severe clinical course. A rapid diagnosis is therefore of major importance.

44

45 We utilized RNA-sequencing ('meta-transcriptomics') to investigate Sweden's first case of  
46 imported haemorrhagic fever for which the aetiological agent was never identified. The  
47 background, initial handling and laboratory analyses, clinical data, epidemiology, and outcome have  
48 been described previously [2,3]. Briefly, a male Swedish traveller returned from a three-month visit  
49 in central and eastern Africa in January 1990, the last month of which was spent in Kenya. Five  
50 days after arriving in Sweden, the patient fell ill with febrile symptoms. On the fourth day after  
51 onset of symptoms, the patient's condition deteriorated rapidly, whereafter he was admitted to a  
52 hospital and shortly thereafter moved to an intensive care unit. Soon after transferal to the intensive  
53 care unit, symptoms expanded to include internal haemorrhaging. During the haemorrhagic episode,  
54 which began at the start of week two and stopped at the end of the third week after symptom onset,  
55 the patient had received 65 units of blood. It is also noteworthy that the patient had an extensive  
56 febrile period, with temperatures consistently above 40°C, that lasted for approximately three weeks  
57 despite symptomatic treatment. His clinical course also included sepsis, respiratory failure and  
58 disseminated intravascular coagulation with thrombocytopenia. After 4.5 weeks, the patient's  
59 condition improved and he was moved from the intensive care unit to a regular ward. He was  
60 discharged 2.5 months after onset of symptoms.

61

62 Initial differential diagnoses excluded leptospirosis, malaria, rickettsiosis, typhoid fever and  
63 septicaemia. Despite attempts with cell-, rodent- and primate inoculation, serological tests, blood  
64 smears and electron microscopy, no aetiological agent was identified and no definitive diagnosis  
65 was reached. However, it was suggested that the haemorrhagic fever might be due to a novel virus,  
66 potentially an undescribed filovirus as indicated by electron microscopy images taken during the  
67 first week of symptoms [2].

68

69

70

## 71 **Methods**

72 We performed a retrospective meta-transcriptomic investigation using a set of separately aliquoted -  
73 80°C stored plasma and urine samples collected between 7–18 days and 28–36 days after onset of  
74 symptoms, respectively (Table 1). Oral and written informed consent was obtained from the patient.  
75 This approach allows for a sensitive and unbiased identification and characterization of all RNA  
76 transcripts in a particular sample with the potential to identify both known and novel pathogens [4].  
77 The methodology used herein has been described previously [4,5]. Briefly, total RNA was extracted  
78 using a combination of trizol–chloroform separation and automated magnetic bead total nucleic  
79 acid extraction using a MagLEAD system (Precision System Science Co.). Following ribosomal  
80 RNA depletion using the Ribo-Zero Gold Kit (Illumina), paired-end (100bp read-length) libraries  
81 were created with (i) the TruSeq stranded TotalRNA kit (Illumina) and sequenced on an Illumina  
82 NovaSeq 6000 instrument at the Science for Life Laboratory, Uppsala, Sweden, and (ii) Trio RNA-  
83 seq library preparation kit (NuGen) and sequenced on the BGI BGI500 (paired-end, 100bp read-  
84 length) platform at BGI, Hong Kong. Subsequently, all RNA sequence libraries were quality  
85 trimmed with Trimmomatic v.0.36 ([www.usadellab.org/cms/?page=trimmomatic](http://www.usadellab.org/cms/?page=trimmomatic)) and human reads  
86 were removed using bbmap (<https://jgi.doe.gov/data-and-tools/bbtools/>) and the human reference  
87 genome (RefSeq assembly: GCF\_000001405.38). The quality-passed and human-trimmed reads  
88 were then screened with Diamond v.0.9.15.116 (<https://github.com/bbuchfink/diamond>) and blastn  
89 against the complete non-redundant protein (nr) and nucleotide (nt) databases, respectively.

90

## 91 **Results**

92 Following inspection of the read hits to known viruses, we were able to identify sequence reads  
93 with high similarity against dengue virus (DENV) in 11 out of 15 sequencing libraries. No other  
94 potential pathogens were identified, aside from human pegivirus (HPgV), formerly known  
95 as GB virus C, in five of the libraries (Table 1), which is usually associated with benign infections  
96 [6].

97

98 All reads of DENV origin were retrieved and re-screened on NCBI blast to identify the most similar  
99 reference genome. Accordingly, a complete DENV-3 genome collected 1985 in Mozambique  
100 (GenBank accession FJ882575.1) was found to exhibit the greatest sequence similarity to the  
101 DENV reads present in the patient libraries. Subsequently, all individual sequence libraries were  
102 mapped against the DENV-3 reference genome from Mozambique using bbmap, resulting in a total,  
103 following merging of read mapping files, of 768 reads (incl. duplicate reads) covering  
104 approximately 38% (4,055 of 10,562 bp) of the viral genome. Similarly, all sequence libraries were  
105 mapped against a HPgV reference genome from USA (MK291245.1) using bbmap, resulting in a

106 total of 115 reads (incl. duplicate reads) for all HPgV positive libraries covering ca. 18% (1,641 of  
107 9,319 bp) of the reference genome.

108

109 To place the partial DENV-3 genome in an evolutionary and epidemiological context, closely  
110 related sequences were retrieved from NCBI/GenBank and aligned using Mafft v.7.271  
111 (<https://mafft.cbrc.jp/alignment/software/>) employing the E-INS-i algorithm. A maximum  
112 likelihood tree was then inferred, via IQ-TREE v.1.6.11 (<http://www.iqtree.org/>), using the  
113 TIM2+F+ $\Gamma_4$  model of nucleotide substitution and a Shimodaira–Hasegawa-like test to assess  
114 branch support. The resultant tree was viewed, annotated in FigTree  
115 (<https://github.com/rambaut/figtree>) and mid-point rooted. The DENV-3 sequence identified here  
116 shared a most recent common ancestor (88.6% bootstrap support) with the reference sequence from  
117 Mozambique, compatible with an African origin for the Swedish infection (Figure 1). The same  
118 analytical procedure was performed HPgV using the GTR+F+R6 model of nucleotide evolution.  
119 The partial HPgV sequence was found within a group of viruses of diverse geographic origins,  
120 although including east Africa (81.5% bootstrap support) (Figure 1).

121

122 The meta-transcriptomic findings were confirmed with real-time PCR, commercial ELISA (Dengue  
123 Virus IgM Capture DxSelect, Focus Diagnostics), and immunofluorescence analysis detecting  
124 dengue virus IgG antibodies [7] (Figure 1). Although negative results can never definitively rule out  
125 an infection of a different aetiological agent, all samples that tested positive for DENV with real-  
126 time PCR [8], yet tested negative for Ebola virus, Crimean-Congo Haemorrhagic Fever virus,  
127 Marburg virus, Rift Valley fever virus, and Lassa virus using PCR.

128

129 All sequence libraries generated in this project, in which human reads have been removed, have  
130 been deposited at the NCBI Short Read Archive under BioProject ID: XXXX. The partial DENV-3  
131 consensus genome generated has been deposited in NCBI GenBank (accession number: YYYY).

132

133

134

135

136

137

138

139

140

141 Table 1. RNA-seq, PCR and serological results for each sample

| Sampling date | Sample ID | Material | DENV   |            |     | HPgV   |            |     |
|---------------|-----------|----------|--------|------------|-----|--------|------------|-----|
|               |           |          | RNAseq | # of reads | PCR | RNAseq | # of reads | PCR |
| 1990-01-24    | OA        | Plasma   | +      | 57         | +   | +      | 53         | -   |
| 1990-01-24    | OB        | Plasma   | +      | 14         | +   | -      | 0          | +   |
| 1990-01-30    | 1B        | Plasma   | +      | 30         | +   | +      | 8          | +   |
| 1990-01-30    | 1C        | Plasma   | +      | 24         |     | +      | 38         |     |
| 1990-01-31    | 2A        | Plasma   | +      | 32         |     | +      | 8          |     |
| 1990-01-31    | 2B        | Plasma   | +      | 18         | +   | +      | 8          | +   |
| 1990-02-01    | 3         | Plasma   | +      | 124        |     | -      | 0          |     |
| 1990-02-02    | 4A        | Plasma   | +      | 213        |     | -      | 0          |     |
| 1990-02-02    | 4B        | Plasma   |        |            | +   |        |            | -   |
| 1990-02-04    | 5A        | Plasma   | +      | 80         |     | -      | 0          |     |
| 1990-02-04    | 5B        | Plasma   | +      | 30         | +   | -      | 0          | -   |
| 1990-02-04    | 5C        | Plasma   | +      | 146        |     | -      | 0          |     |
| 1990-02-14    | 6         | Urine    | -      | 0          | -   | -      | 0          |     |
| 1990-02-18    | 7         | Urine    | -      | 0          | -   | -      | 0          |     |
| 1990-02-18    | 8         | Urine    | -      | 0          |     | -      | 0          |     |
| 1990-02-22    | 9         | Urine    | -      | 0          | -   | -      | 0          |     |

142 \*Onset of symptoms = 1990-01-17

143

144

145

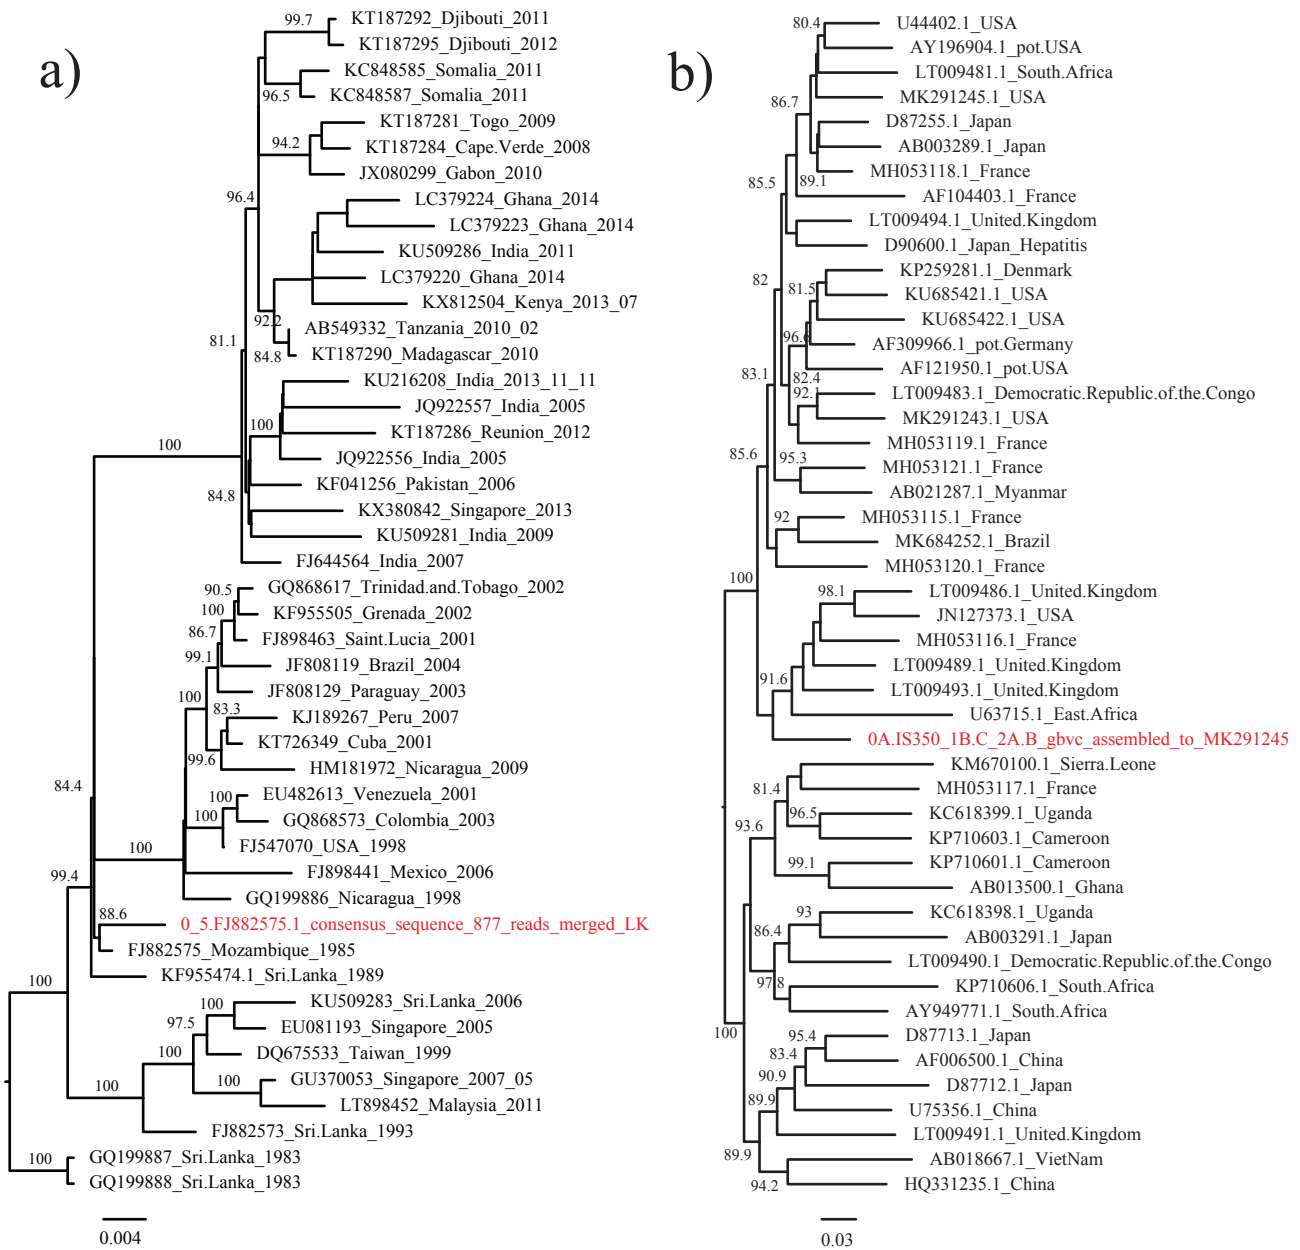

146

147 **Figure 2.** Phylogenetic trees of (a) DENV-3 and (b) HPgV, respectively, with representative  
 148 sequences. The tree were mid-point rooted for visual purposes only. Numbers on branches indicate  
 149 bootstrap support above 80%. Scale-bars indicates the number of nucleotide substitutions per site.

150

### 151 Discussion

152 Using a meta-transcriptomic approach we identified DENV-3 as the likely aetiological agent of an  
 153 undiagnosed severe haemorrhagic fever episode in a patient returning to Sweden following travel to  
 154 central and eastern Africa in 1990.

155

156 Over the last 50 years the four serotypes of DENV have spread globally and become established in  
 157 almost all regions, where previously only one serotype was present. Although DENV is likely  
 158 endemic in many African countries, infections with this virus have only been reported sporadically

159 from African countries [9], with DENV-3 first identified in Mozambique in 1984 [10]. Phylogenetic  
160 analysis shows that the DENV-3 identified here groups with the sequence from Mozambique from  
161 the 1984–1985 epidemic, compatible with an African origin (Figure 1). This adds support to the  
162 conclusion that the patient was infected with DENV-3, most likely during his final one-month stay  
163 in Kenya, a location where DENV is greatly under-sampled. A DENV-3 infection might also  
164 explain why there were no secondary cases to any of the care givers or laboratory staff at the  
165 hospital, although direct blood exposure was reported [2].

166

167 In five of the sequencing libraries (Table 1), partly confirmed with PCR, we noted the presence of  
168 HPgV, phylogenetically indicated to be of non-African origin (Figure 1). HPgV is a common virus,  
169 present in up to 5% of healthy blood-donors [6], and is most closely related to simian pegiviruses  
170 [11]. HPgV is currently not definitively associated with any disease [12], and the majority of  
171 individuals clear the infection within two years [6]. However, HPgV co-infection has been linked to  
172 increased survival rates in Ebola virus and human immunodeficiency virus patients [13,14]. As  
173 HPgV was found to be present before and during the haemorrhagic episode in the present study, we  
174 cannot draw any firm conclusions as for the potential clinical impact of this.

175

176 In conclusion, we show that total RNA-sequencing is a usable and sensitive tool to investigate  
177 undiagnosed cases caused by an infectious aetiological agent, with the potential to identify possible  
178 viral co-infections. Our study also adds support to the notion that dengue virus has most likely been  
179 present, potentially endemic, in many sub-Saharan African countries for decades, possible causing  
180 unrecognized cases of both dengue fever and more severe dengue disease. Increased surveillance  
181 efforts will aid in more accurately estimating the true burden of dengue in sub-Saharan African  
182 countries where it is clearly heavily underestimated [15].

183

## 184 **Acknowledgement**

185 JHOP is funded by the Swedish research council FORMAS (grant no: 2015-710). ECH is funded by  
186 an ARC Australian Laureate Fellowship (FL170100022).

## 187 **References**

188

- 189 1. Paessler S, Walker DH. Pathogenesis of the viral hemorrhagic fevers. *Annu Rev Pathol.* **2013**;  
190 8:411–440.
- 191 2. Foberg U, Frydén A, Isaksson B, et al. Viral haemorrhagic fever in Sweden: experiences from  
192 management of a case. *Scand J Infect Dis.* **1991**; 23(2):143–151.
- 193 3. Kenyon RH, Niklasson B, Jahrling PB, et al. Virologic investigation of a case of suspected  
194 haemorrhagic fever. *Res Virol.* **1994**; 145(6):397–406.

- 195 4. Pettersson JH-O, Piorkowski G, Mayxay M, et al. Meta-transcriptomic identification of  
196 hepatitis B virus in cerebrospinal fluid in patients with central nervous system disease. *Diagn*  
197 *Microbiol Infect Dis.* **2019**; 95(4):114878.
- 198 5. Ling J, Persson Vinnersten T, Hesson JC, et al. Identification of hepatitis C virus in the  
199 common bed bug - a potential, but uncommon route for HCV infection? *Emerg Microbes*  
200 *Infect.* **2020**; 9(1):1429–1431.
- 201 6. Bhattarai N, Stapleton JT. GB virus C: the good boy virus? *Trends Microbiol.* **2012**;  
202 20(3):124–130.
- 203 7. Vene S, Mangiafico J, Niklasson B. Indirect immunofluorescence for serological diagnosis of  
204 dengue virus infections in Swedish patients. *Clin Diagn Virol.* **1995**; 4(1):43–50.
- 205 8. Alm E, Lesko B, Lindegren G, et al. Universal single-probe RT-PCR assay for diagnosis of  
206 dengue virus infections. *PLoS Negl Trop Dis.* **2014**; 8(12):e3416.
- 207 9. Amarasinghe A, Kuritsky JN, Letson GW, Margolis HS. Dengue virus infection in Africa.  
208 *Emerging Infect Dis.* **2011**; 17(8):1349–1354.
- 209 10. Gubler DJ, Sather GE, Kuno G, Cabral JR. Dengue 3 virus transmission in Africa. *Am J Trop*  
210 *Med Hyg.* **1986**; 35(6):1280–1284.
- 211 11. Porter AF, Pettersson JH-O, Chang W-S, et al. Novel hepaci- and pegi-like viruses in native  
212 Australian wildlife and non-human primates. *Virus Evolution* [Internet]. **2020** [cited 2020 Aug  
213 29]; . Available from: [https://academic.oup.com/ve/advance-](https://academic.oup.com/ve/advance-article/doi/10.1093/ve/veaa064/5894981)  
214 [article/doi/10.1093/ve/veaa064/5894981](https://academic.oup.com/ve/advance-article/doi/10.1093/ve/veaa064/5894981)
- 215 12. Stapleton JT, Fong S, Muerhoff AS, Bukh J, Simmonds P. The GB viruses: a review and  
216 proposed classification of GBV-A, GBV-C (HGV), and GBV-D in genus Pegivirus within the  
217 family Flaviviridae. *J Gen Virol.* **2011**; 92(Pt 2):233–246.
- 218 13. Heringlake S, Ockenga J, Tillmann HL, et al. GB virus C/hepatitis G virus infection: a  
219 favorable prognostic factor in human immunodeficiency virus-infected patients? *J Infect Dis.*  
220 **1998**; 177(6):1723–1726.
- 221 14. Lauck M, Bailey AL, Andersen KG, Goldberg TL, Sabeti PC, O'Connor DH. GB virus C  
222 coinfections in west African Ebola patients. *J Virol.* **2015**; 89(4):2425–2429.
- 223 15. Bhatt S, Gething PW, Brady OJ, et al. The global distribution and burden of dengue. *Nature.*  
224 **2013**; 496(7446):504–507.

225
